# Supplementary material
Source: bioRxiv or medRxiv preprint supplement (https://www.biorxiv.org/highwire/filestream/2234/field_highwire_adjunct_files/0/003665-1.pdf)
Supplement: Supplementary file [file 003665-1.pdf]

# Supplement: Flexible analysis of transcriptome assemblies with Ballgown

Alyssa C. Frazee<sup>1</sup>, Geo Pertea<sup>2,3</sup>, Andrew E. Jaffe<sup>1,3,4</sup>, Ben Langmead<sup>1,2,3,5</sup>,  
Steven L. Salzberg<sup>1,2,3,5</sup>, & Jeffrey T. Leek<sup>1,3,\*</sup>

August 2014

1. Department of Biostatistics, Johns Hopkins Bloomberg School of Public Health
2. McKusick-Nathans Institute of Genetic Medicine, Johns Hopkins University School of Medicine
3. Center for Computational Biology, Johns Hopkins University
4. Lieber Institute for Brain Development, Johns Hopkins Medical Campus
5. Department of Computer Science, Johns Hopkins University

\* *Correspondance to jtleek@gmail.com*

## 1 *Tablemaker* output files

*Tablemaker* outputs the following set of related tab-delimited text files. *Tablemaker* is designed to be run on the output of *Cufflinks* and *Cuffmerge* but *Ballgown* can be used with any assembly output that can be converted into the following sets of tab-delimited files.

- *e\_data.ctab*: exon-level expression measurements. One row per exon. Columns are *e\_id* (numeric exon id), *chr*, *strand*, *start*, *end* (genomic location of the exon), and the following expression measurements for each sample:
  - *rcount*: reads overlapping the exon
  - *ucount*: uniquely mapped reads overlapping the exon
  - *mrcount*: multi-map-corrected number of reads overlapping the exon
  - *cov*: average per-base read coverage
  - *cov\_sd*: standard deviation of per-base read coverage
  - *mcov*: multi-map-corrected average per-base read coverage

- *mcov\_sd*: standard deviation of multi-map-corrected per-base coverage
- *i\_data.ctab*: intron- (i.e., junction-) level expression measurements. One row per intron. Columns are *i\_id* (numeric intron id), *chr*, *strand*, *start*, *end* (genomic location of the intron), and the following expression measurements for each sample:
  - *rcount*: number of reads supporting the intron
  - *ucount*: number of uniquely mapped reads supporting the intron
  - *mrcount*: multi-map-corrected number of reads supporting the intron
- *t\_data.ctab*: transcript-level expression measurements. One row per transcript. Columns are:
  - *t\_id*: numeric transcript id
  - *chr*, *strand*, *start*, *end*: genomic location of the transcript
  - *t\_name*: Cufflinks-generated transcript id
  - *num\_exons*: number of exons comprising the transcript
  - *length*: transcript length, including both exons and introns
  - *gene\_id*: gene the transcript belongs to
  - *gene\_name*: HUGO gene name for the transcript, if known
  - *cov*: per-base coverage for the transcript (available for each sample)
  - *FPKM*: Cufflinks-estimated FPKM for the transcript (available for each sample)
- *e2t.ctab*: table with two columns, *e\_id* and *t\_id*, denoting which exons belong to which transcripts. These ids match the ids in the *e\_data* and *t\_data* tables.
- *i2t.ctab*: table with two columns, *i\_id* and *t\_id*, denoting which introns belong to which transcripts. These ids match the ids in the *i\_data* and *t\_data* tables.

## 2 The *Ballgown* pipeline and S4 class

The *Ballgown* infrastructure is designed to be a tool-agnostic bridge between transcriptome assemblers and abundance estimation tools, and differential expression analysis pipelines in R and Bioconductor (Supplementary Figure 1). In its current form, the software can be used with any assembly whose structure is specified in GTF format and a set of spliced read alignments in BAM format: *Tablemaker* can be used to estimate transcript-level FPKMs with *Cufflinks*, or RSEM (`rsem-calculate-expression`) can be used to estimate transcript- and gene-level TPMs and FPKMs. The *Ballgown* R package can automatically read in either *Tablemaker* or RSEM output, and any assembler outputting files in the *Tablemaker* format (Supplementary Section 1) can easily be incorporated into the pipeline.

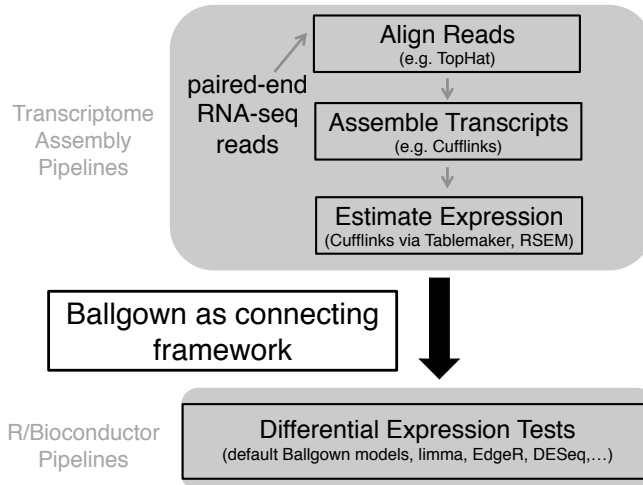

Figure 1: **Ballgown as a bridge between transcriptome assembly and fast, flexible differential expression analysis.** The *Ballgown* workflow connects transcript assembly tools like *Tophat2* and *Cufflinks* to Bioconductor tools like *EdgeR* and *DESeq* for downstream analysis.

The *Ballgown* R package provides a comprehensive data structure for transcriptome assemblies (Supplementary Figure 2). We define an S4 class `ballgown` with slots for (a) expression data, including several measurements for transcripts, exons, and introns, (b) assembly structure, which utilizes the efficient `GenomicRanges` [15] data structure to store information about exons, introns, and transcripts, and (c) other relevant assembly data, including phenotype data, relationships between exons, introns, and transcripts, and paths to alignment files on disk for easy connection with the assembly.

### 3 Data, notation, and statistical models

There are two distinct components to the data that *Ballgown* is equipped to analyze: the actual structure of the assembled transcriptome: (1) genomic locations of features and the relationships between exons, introns, transcripts and (2) genes and the expression measurements for the features in the transcriptome. Here we precisely define both the assembly structure and the associated data.

#### Assembly structure

The transcriptome is assembled based on a set  $R$  of aligned RNA-seq reads. We denote the  $y$ th read from the  $z$ th sample with  $r_{yz}$ , where  $y = 1, \dots, N_z$  and  $z = 1, \dots, n$ , so there are  $n$  samples in the study, and sample  $z$  has  $N_z$  aligned reads.

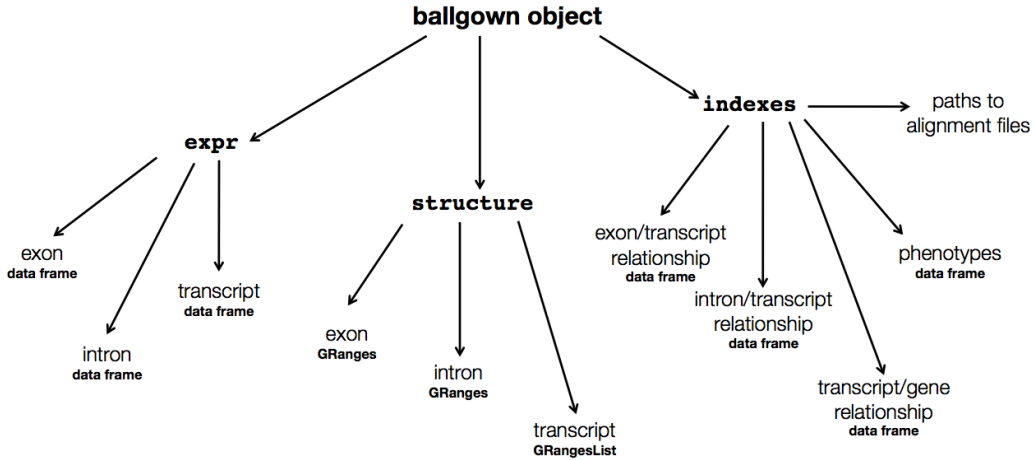

Figure 2: **The ballgown data structure.** The *Ballgown* R package loads assembly data into an object with linked data frames of expression measurements for exons, introns, and transcripts. The object also loads information about exon, intron, and transcript structures and corresponding indexes for matching structures, expression measurements, and phenotype data.

The transcriptome assembled from the reads consists of four types of features: transcripts, genes, exons, and introns. These features all have start and finishing positions on the genome, which represent using the functions  $s()$  and  $f()$ , e.g.,  $s(x)$  represents the start position of feature  $x$ . The  $K$  assembled transcripts are denoted by  $t_k$ , where  $k = 1, \dots, K$ . These transcripts can be organized into  $G$  genes, denoted by  $g_l$ ,  $l = 1, \dots, G$ . Each gene can be represented by a set of transcripts falling within its boundaries:

$$g_l = \{t_k : s(t_k) > s(g_l) \text{ and } f(t_k) < f(g_l)\}$$

The assembly also contains  $M$  exons, each of which we represent as a closed interval of genomic locations:

$$e_m = [s(e_m), f(e_m)], m = 1, \dots, M$$

With this notation, we can then represent transcript  $k$  as a subset of the  $M$  exons comprising the assembly:

$$t_k = \{e_m : m \in I_k\}, I_k \subset \{1, \dots, M\}$$

Here,  $I_k$  represents the indices of the exons that make up transcript  $k$ . Note that the exon  $e_m$  can belong to several different transcripts. We can then easily define  $s(t_k)$  and  $f(t_k)$  in terms of exon boundaries:

$$s(t_k) = \min\{s(e_m) : m \in I_k\}$$

$$f(t_k) = \max\{f(e_m) : m \in I_k\}$$

Finally, let  $w_k$  represent the  $w$ th element of  $I_k$ . Then we can denote the  $w$ th intron in transcript  $k$  with an open interval:

$$i_{kw} = (f(e_{w_k}), s(e_{(w+1)_k}))$$

In other words,  $i_{kw}$  is simply the genomic interval between the  $w$ th and  $w + 1$ th exons of transcript  $k$ .

With these definitions in place, we can now precisely define the reads  $r_{yz}$ . An RNA-seq read is simply a subsequence of an RNA transcript. Using set notation, we can define each read using the form:

$$r_{yz} = \left\{ x \in [E, E'] : E < E' \text{ and } x, E, E' \in \bigcup_{m \in I_k} e_m \text{ for some } k \right\}$$

An assembly algorithm applied to the set of reads  $r_{yz}$  produces estimates of the exons:  $\hat{e}_m, m = 1, \dots, M$ , transcripts:  $\hat{t}_k, k = 1, \dots, K$  of the transcripts and genes:  $\hat{g}_l, l = 1, \dots, G$ . Most current statistical models treat this assembly as fixed and correct when performing analyses. But as we will demonstrate in the methods section, assembled transcripts are subject to error and may be improved through statistical analysis [19, 26].

## Expression data

Next we can define expression measurements for each type of feature given a particular assembled set of transcripts. Here we define sensible expression measurements that are currently implemented in the *Ballgown* package, but the statistical models are flexible enough to handle other types of measures as well.

For each sample  $z$ , each transcript  $\hat{t}_k$  has two measurements that are calculated by our upstream *Ballgown* preprocessing software: average per-base read coverage:  $cov(t_k, z)$  and FPKM (fragments per kilobase of transcript per million mapped reads):  $FPKM(t_k, z)$ . Currently, these transcript-level measurements are estimated in *Cufflinks* via maximum likelihood; the procedure is described in detail by [27].

Each gene  $g_l$  has one expression measurement for each sample,  $FPKM(g_l, z)$ . This measurement is reconstructed from the transcripts in  $g_l$  as follows: first, the number of fragments per million mapped reads for sample  $z$  for each  $t_k \in g_l$  is calculated by multiplying  $FPKM(t_k, z)$  by the length of transcript  $t_k$  in kilobases. The gene's total fragments per million mapped reads is the sum of the transcript-level fragments per million mapped reads for all the transcripts in the gene. Finally, the gene-level FPKM is calculated by dividing the gene's total fragments per million mapped reads by the gene's length.

The *Ballgown* preprocessor also calculates average per-base read coverage for each exon in the assembly, given the assembly structure and the aligned reads  $R$ . For sample  $z$ , we have:

$$cov(e_m, z) = \frac{\sum_{r_{yz} \in R} \sum_{bp \in [s(e_m), f(e_m)]} \mathbb{1}\{bp \in r_{yz}\}}{f(e_m) - s(e_m) + 1}$$

Each exon also has a raw read count, defined as the number of reads whose alignments overlap that exon:

$$rcount(e_m, z) = \sum_{r_{yz} \in R} \mathbb{1}\{r_{yz} \cap e_m \neq \emptyset\}$$

The main expression measurement for introns is also raw read count, defined as the number of reads whose alignments support the intron in the sense that their alignments are split across that intron’s neighboring exons:

$$rcount(i_{kw}, z) = \sum_{r_{yz} \in R} \mathbb{1}\{s(r_{yz}) \in e_m \text{ and } f(r_{yz}) \in e_{m'}\}$$

where  $m \leq w_k$  and  $m' \geq (w + 1)_k$ .

## Statistical methods for detecting differential expression

After exploring the structure of the assembled transcriptome and performing any necessary transcript post processing, the next step is to identify transcripts or genes that are differentially expressed across groups. Here we outline a framework for statistical analysis of transcript and gene abundances. To make the ideas concrete we use FPKM as the expression measurement and transcripts as the feature of interest, but these can be replaced in the following model definitions with any of the expression measurements and any of the available genomic features in the assembly (genes, transcripts, exons, or introns).

Differential expression tests are implemented as follows: for each transcript  $\hat{t}_k$ , the following model is fit:

$$h(FPKM(\hat{t}_k, z)) = \alpha_k + \sum_{p=1}^P \beta_{pk} X_{zp} + \varepsilon_{zk} \quad (1)$$

where:

- $FPKM(\hat{t}_k, z)$  is the FPKM expression measurement for transcript  $k$  for sample  $z$
- $h$  is a transformation [3] to reduce the impact of mean-variance relationships observed in the counts [2]. For example, the transformation  $h(\cdot) = \log_2(\cdot + 1)$  is commonly applied in the analysis of sequence-count data [13].
- $\alpha_k$  represents the baseline expression for transcript  $k$
- $X_{zp}$  represents covariate  $p$  for sample  $z$ . These covariates differ by experiment type.  $X_{z1}$  generally represents a library size adjustment for sample  $z$ . Assuming  $c_k$  represents the 75th percentile of all log FPKM values for transcript  $k$ , `ballgown`’s default the covariate  $X_{1z}$  is:

$$\sum_k FPKM(\hat{t}_k, z) \mathbb{1}[FPKM(\hat{t}_k, z) \leq c_k]$$

This normalization term is derived from the ”cumulative sum scaling” (CSS) normalization approach [20].

- $\beta_{pk}$  quantifies the association of covariate  $p$  on the expression of transcript  $k$
- $\varepsilon$  represents residual measurement error

A flexible approach to differential expression is to compare nested sub models of model (1) using parametric F-tests [23]. The null hypothesis can be as flexible as any linear contrast of the coefficients  $\beta_{pk}$  but for simplicity we focus on null hypotheses of the form:  $H_0 : \beta_{pk} = 0, p \in \mathcal{S}$  versus the alternative that all  $\beta_{pk}$  are nonzero. The general principle is that a model including any potential confounders plus the covariate(s) of interest – a 0/1 indicator for group in the two-group comparison, several indicator variables for the multi-group comparison, or a generalized additive model [11] for a time variable for timecourse experiments – is compared with a model that includes only the potential confounders. For the two models fit for each transcript  $k$ , *Ballgown* calculates the statistic

$$F = \frac{\frac{RSS_0 - RSS_1}{P_1 - P_0}}{\frac{RSS_1}{n - P_1}}$$

where  $RSS_0$  represents the residual sum of squares from the model without group or time covariates,  $RSS_1$  represents the residual sum of squares from the model including the covariates of interest,  $P_0$  is the number of covariates in the smaller model,  $P_1$  is the number of covariates in the larger model, and  $n$  is the total number of samples. Under the null hypothesis that the larger model does not fit the data significantly better than the smaller model, this statistic follows an  $F$  distribution with  $(P_1 - P_0, n - P_1)$  degrees of freedom, so p-values can be generated by comparing the two models for each transcript  $k$  [16]. We control for multiple testing using standard FDR controlling procedures [24].

## 4 Methods for data analyses

### Processing the GEUVADIS data

We downloaded the FASTQ files from the GEUVADIS project from <http://www.ebi.ac.uk/ena/data/view/ERP001942>. With this data, we:

- Aligned reads with TopHat 2.0.9, using the `-G` option to align reads to the transcriptome first. We used the hg19 genome reference available from the Illumina iGenomes project.
- Assembled sample-specific transcriptomes with *Cufflinks* 2.1.1, using default options and no annotation
- Merged sample-specific assemblies into an experiment-wide assembly with *Cuffmerge* 2.1.1
- Estimated feature expression and organized the assembly with *Tablemaker* so that all files described in Supplementary Section 1 were available.

- Created several *Ballgown* objects using the *Ballgown* R package

The resulting *Ballgown* objects include phenotype data available from several sources, including <http://www.ebi.ac.uk/ena/data/view/ERP001942>, the 1000 Genomes Project [5], and additional quality control data from GEUVADIS researchers (available at [https://github.com/alyssafrazee/ballgown\\_code/blob/master/GEUVADIS\\_preprocessing/GD667.QCstats.masterfile.txt](https://github.com/alyssafrazee/ballgown_code/blob/master/GEUVADIS_preprocessing/GD667.QCstats.masterfile.txt)). The *Ballgown* R objects are available for download at [http://figshare.com/articles/GEUVADIS\\_Processed\\_Data/1130849](http://figshare.com/articles/GEUVADIS_Processed_Data/1130849). So the objects can be feasibly loaded into memory and stored on disk, a separate object is available for each expression measurement.

## InSilico DB Analyses

InSilico DB [4] includes processed data from public experiments on the Sequence Read Archive. We downloaded the *Cuffdiff2* output from the cancer versus normal and developmental data sets from InSilico DB on March 5th, 2014. We extracted the p-values for differential expression for the cancer versus normal comparison [12] and the embryonic stem cells versus preimplantation blastomeres data. We also reformatted the FPKM values from this analysis and applied the linear models included in the *Ballgown* package to perform the comparison. The versions and parameters for the software used by *InSilico DB* were *cufflinks*, *cuffmerge*, *cuffdiff*: v 2.0.2, *cufflinks* -p 6 -q, *tophat*: v 2.0.4 -mate-inner-dist 80 -no-coverage-search (personal communication Alain Coletta from the InSilico DB).

In order to run the latest versions of *TopHat*, *Cufflinks*, and *Cuffdiff2*, we downloaded the raw sequencing reads from both experiments from the NCBI Sequence Read Archive [17]. The analysis steps were the same as the steps outlined for processing the GEUVADIS dataset in the previous subsection, except *TopHat2* version 2.0.11 and *Cufflinks* version 2.2.1 was used. In addition, there was a small change at the *Cufflinks* step: because the data sets in InSilico DB were created by estimating transcript abundances for pre-annotated isoforms, we did the same when we processed the data ourselves. This means we ran *Cufflinks* with the -G option and estimated FPKM values for Illumina's iGenomes annotated genes for hg19. These are the isoforms considered in the analysis results.

We analyzed data from an experiment comparing lung adenocarcinoma ( $n = 12$ ) and normal control samples ( $n = 12$ ) in nonsmoking female patients [12] and from an experiment comparing cells at five developmental stages [29]. Since *Cuffdiff2* was designed for two-class comparisons, we only compared expression between two developmental stages: embryonic stem cells ( $n = 34$ ) and pre-implantation blastomeres ( $n = 78$ ). We compared results from *Cuffdiff2* (versions 2.0.2 and 2.2.1), the linear models from *Ballgown*, the empirical Bayes linear modeling framework implemented in *limma* [23], and EBSeq [18], a Bayesian framework designed for isoform-level differential expression.



## Simulation Studies

To ensure that the linear models implemented in *Ballgown* perform accurately, we performed two separate simulation studies. For both studies, reads were generated from 2745 annotated transcripts on Chromosome 22 from Ensembl [8], using genome build GRCh37 and Ensembl version 74. Data was generated for 20 biological replicates, divided into two groups of 10, where 274 transcripts were randomly chosen to be differentially expressed (at a 6x increase in expression level) in one of the two groups, randomly chosen.

The first simulation study was set up as follows:

- Expression was measured in FPKM. Each transcript’s baseline mean FPKM value was determined based on the distribution of mean FPKM values for highly-expressed transcripts in the GEUVADIS dataset. Specifically, the mean of all nonzero FPKM values was calculated for each transcript in the GEUVADIS dataset with mean FPKM larger than 100, and each isoform in the simulated dataset was assigned a randomly selected baseline mean FPKM from this distribution.
- We defined a log-log relationship between a transcript’s mean expression level and the variance of its expression levels:

$$\log \text{variance} = 2.23 \log \text{mean} - 3.08$$

This relationship was estimated empirically from the assembled GEUVADIS transcriptome (transcripts with mean FPKM values greater than 10) using simple linear regression. The GEUVADIS dataset includes both biological and technical replicates, so this model should encompass both biological and technical variability.

- Then, for each transcript, we randomly drew FPKM expression values from a log-normal distribution with the pre-set mean and variance. For the differentially expressed transcripts, the pre-set mean FPKM was 6 times larger in one group than in the other.
- For each transcript, we also set a sample’s expression level to 0 with probability  $p_0$ , which was estimated from the GEUVADIS data: for each simulated transcript,  $p_0$  was randomly drawn from the empirical distribution of the proportion of samples with zero expression, over transcripts in the GEUVADIS dataset with mean FPKM larger than 100.
- To translate the pre-set FPKM value into a number of reads to be generated from a transcript for a given sample, we used the definition of FPKM and calculated the number of “fragments” (reads) that should be generated from a transcript by multiplying the set FPKM value by the transcript’s length over 1000, then multiplying by an approximate library size of 150,000 reads, over 1 million. The decision to use a mixture of two distributions (log-normal and point mass at 0) was informed by exploratory analysis of the FPKM distributions among several transcripts in the GEUVADIS dataset. The exploratory analysis is available at <http://htmlpreview.github.io/?https://>

[github.com/alyssafrazee/ballgown\\_code/blob/master/simulations/mean\\_var\\_relationship.html](https://github.com/alyssafrazee/ballgown_code/blob/master/simulations/mean_var_relationship.html).

This simulation setup made it such that more reads were generated from longer transcripts, as is expected with RNA-seq protocols.

A second simulation was also conducted with a slightly simpler setup:

- Expression was defined directly by the number of reads being generated from each transcript (instead of using FPKM).
- The mean number of reads generated from each transcript was set to be 300, unless the transcript was randomly selected to be overexpressed in one group, in which case, that group’s mean read number for that transcript was 1800.
- The actual number of reads to be simulated from a transcript was drawn from a negative binomial distribution with mean  $\mu = 300$  or 1800, and size equal to  $0.005\mu$  (so, 1.5 for  $\mu = 300$  and 9 for  $\mu = 1800$ ). Note that in the negative binomial distribution, the variance is equal to  $\mu + \mu^2/\text{size}$ .
- Each sample’s read counts were scaled and rounded such that approximately 600,000 reads were generated per sample.

For both these scenarios, the specified number of reads was then generated from transcripts using the *polyester* package. These simulated reads were then aligned to the genome using TopHat 2.0.11 (aligning to the annotated transcriptome first with the `-G` option), and the resulting alignments were used to assemble transcripts with *Cufflinks* 2.2.1. *Cuffdiff2* (2.2.1) was then run on the simulated datasets. For the *Ballgown* results, we used *Tablemaker* to organize the output, but because *Tablemaker* calls *Cufflinks* version 2.1.1 to estimate per-transcript FPKMs, we updated the `ballgown` object to use the FPKMs written in the `isoforms.read_group_tracking` file by *Cuffdiff2*.

The following models were fit for each transcript in each simulation scenario:

$$\begin{aligned} H_A & : \log_2(FPKM_i + 1) = \beta_0^* + \beta_1^*grp_i + \eta^*q75_i + \epsilon_i^* \\ H_0 & : \log_2(FPKM_i + 1) = \beta_0 + \eta q75_i + \epsilon_i \end{aligned}$$

where  $grp_i$  is the value of the group indicator for sample  $i$  and  $q75$  is a library-size normalizing constant equal to the sum of the log of the nonzero FPKM values to the 75th percentile (known as "cumulative sum scaling" normalization; [20]). We then tested the hypothesis  $H_0 : \beta_1^* = 0$  versus the alternative that the coefficient was non-zero. For the analysis with average coverage we replaced  $FPKM_i$  with  $acov_i$  in the above equations.

We performed simulation studies to precisely assess the accuracy of the differential expression methods. However, assessing the accuracy of transcript-level differential expression is complicated because the annotated transcripts from which reads were generated do not exactly match the assembled transcripts which were tested for differential. This means there

is no standard way to define which assembled transcripts should be called differentially expressed. In our accuracy assessments (Supplementary Figure 8), we chose to identify the three closest assembled “neighbors” for each of the 274 truly DE annotated transcripts. Distance was measured by percent overlap, so each annotated transcript’s 3 closest assembled neighbors were the 3 transcripts overlapping it the most. All of these selected “neighbors” were considered as part of the sensitivity and specificity calculations: sensitivity was defined as the ratio of the number of truly differentially expressed annotated transcripts with at least one of its three closest assembled neighbors called differentially expressed to the total number of truly differentially expressed annotated transcripts. Specificity was defined as percentage of “non-neighbor” assembled transcripts that were correctly called not differentially expressed, where “non-neighbor” means the assembled transcript was not one of the three closest to an annotated transcript set to be differentially expressed.

## RIN Analysis

We filtered to the 464 unique replicates in the GEUVADIS study [1] as indicated in the quality control data, and we analyzed only transcripts with FPKM > 0.1. We first searched for differential expression with respect to RNA quality (RIN) using the following set of nested linear models to each transcript.

$$\begin{aligned}
 H_A & : \log_2(FPKM_i + 1) = \beta_0^* + \sum_{t=1}^4 \beta_t^* \text{spline}_t(RIN_i) + \sum_{p=1}^5 \gamma_p^* 1(Pop_i = p) + \eta^* q75_i + \epsilon_i^* \\
 H_0 & : \log_2(FPKM_i + 1) = \beta_0 + \sum_{p=1}^5 \gamma_p 1(Pop_i = p) + \eta q75_i + \epsilon_i
 \end{aligned}$$

Here  $i$  indicates sample and the subscript for transcript has been suppressed for clarity.  $H_0$  denotes the null model and  $H_A$  denotes the alternative. The first set of terms encode a natural cubic spline fit with 4 degrees of freedom between the  $RIN$  values and the FPKM levels; the term  $\text{spline}_t(RIN_i)$  refers to the  $t$ th B-spline basis term for sample  $i$ . The second set of terms encode a factor model for the relationship between population and FPKM and the last term is a library size normalization term that consists of the sum of log of the the non-zero FPKMs up to the 75th percentile for that sample (“cumulative sum scaling” normalization; [20]). We then tested the hypothesis that  $H_0 : \beta_1 = \beta_2 = \beta_3 = 0$  versus the alternative that at least one coefficient was non-zero. All transcripts with a q-value [24] less than 0.05 were called significant.

Next we attempted to identify transcripts that were significantly better explained by a non-linear polynomial fit, rather than a linear trend. We fit the following nested set of models:

$$H_A : \log_2(FPKM_i + 1) = \beta_0^* + \sum_{t=1}^3 \beta_t^* RIN_i^t + \sum_{p=1}^5 \gamma_p^* 1(POP_i = p) + \eta^* q75_i + \epsilon_i^* \quad (2)$$

$$H_0 : \log_2(FPKM_i + 1) = \beta_0 + \beta_1 RIN_i + \sum_{p=1}^5 \gamma_p 1(POP_i = p) + \eta q75_i + \epsilon_i \quad (3)$$

and tested the hypothesis that  $H_0 : \beta_2 = \beta_3 = 0$  versus the alternative that at least one of the higher order polynomial coefficients was nonzero. Again, all transcripts with a q-value [24] less than 0.05 were called significant.

The transcripts in the figure were statistically significant at the FDR 5% level for this second analysis. In the plots, the curves represent the fitted values for the average library size within each population. We show one example each of a positive and negative relationship between expression and RIN. While there were several examples of associations in both directions, there were more positive associations, as expected (Supplementary Figure 3).

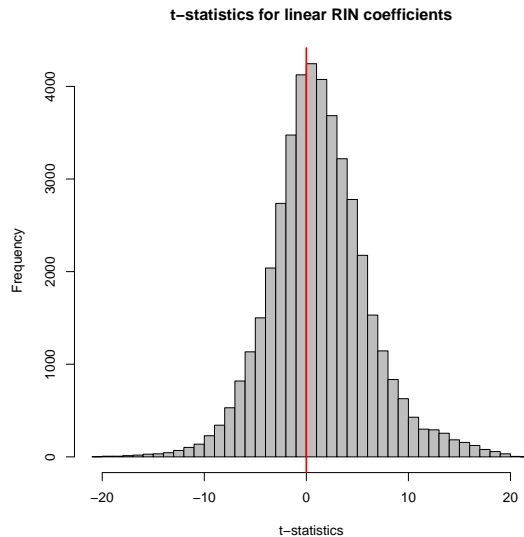

Figure 3: **Distribution of  $t$ -statistics for the linear  $RIN$  term for GEUVADIS transcripts.** These are moderated  $t$ -statistics calculated with *limma* for the  $\beta_1$  coefficient in model (3), indicating directionality of the RIN-FPKM relationship. We observe associations in both directions, but as expected, there are more positive associations.

## eQTL Analysis

We downloaded genotype information for the GEUVADIS cohort from <ftp://ftp.ebi.ac.uk/pub/databases/microarray/data/experiment/GEUV/E-GEUV-1/genotypes/>. We filtered to only SNPs with a minor allele frequency greater than 5%. We used the processed

transcriptome data from *Tablemaker* as described above. We removed samples that were sequenced multiple times according to the protocol described by GEUVADIS [1]. We calculated the first three principal components of the genotype data using the Plink software [21]. We filtered to transcripts with an average FPKM > 0.1 and took the log2 transform of the FPKM values. We then used the MatrixEQTL package [22] to perform the eQTL analysis testing an additive linear regression model for the SNPs adjusting for three expression principal components and three genotype principal components. We filtered to only transcript-SNP pairs that were no more than 1000Kb apart.

We recorded the histogram of p-values from all transcript-SNP pairs. We calculated an estimate of the fraction of null hypotheses based on the distribution of observed p-values [24] and obtained an estimate of  $\hat{\pi}_0 = 0.942$ . The p-value histogram (Figure 4a) and QQ-plot of  $-\log_{10}(\text{p-values})$  (Figure 4b) versus their theoretical distribution under the null do not show any gross deviation suggesting unmodeled confounding [7].

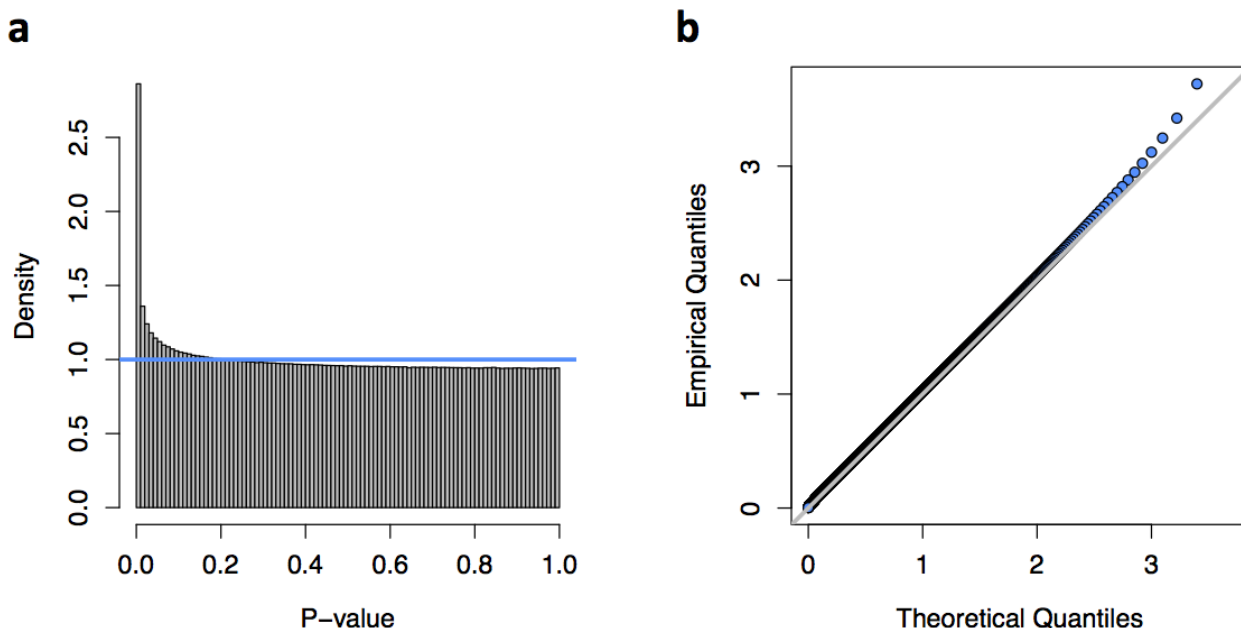

Figure 4: **Distribution of statistical significance scores for all cis-eQTL tests** **a.** P-value histogram for all p-values from cis-eQTL tests, the estimated fraction of null hypotheses is 94.2%. **b.** QQ-plot of  $-\log_{10}(\text{p-values})$  versus theoretical quantiles shows no gross deviation from expected behavior.

For the transcript overlap analysis, we downloaded the list of significant cis-eQTL from <ftp://ftp.ebi.ac.uk/pub/databases/microarray/data/experiment/GEUV/E-GEUV-1/genotypes/> for the EUR and YRI populations. We identified all Ensembl genes overlapped to any degree by each assembled transcript. We then calculated the number of gene-SNP pairs in common between the GEUVADIS EUR and YRI analyses and our eQTL analysis.

## 5 Additional results: statistical significance

### 5.1 Negative and positive control experiments

The main manuscript describes two experiments we designed. The first was a negative control experiment, performed to demonstrate that the default methods in *Ballgown* perform appropriately in a scenario where there is no differential expression signal. Subjects in the FIN population group in the processed GEUVADIS dataset were randomly assigned to one of two groups, and all assembled transcripts for differential expression between those two groups. Linear models as implemented in *Ballgown* gave uniformly distributed null p-values, as expected (Figure 1a, main manuscript). However, the statistical results from *Cuffdiff2* (version 2.2.1, the newest release available as of August 2014) on the same dataset, gave p-values that were not uniformly distributed but instead were biased toward 1 (Supplementary Figure 5a). At the exon level, the p-value distribution from *EdgeR* was also not uniform, having a bit of extra mass around 0.1 (Supplementary Figure 5b). These results show that a well-established, count-based methods gives a slightly too-liberal result on this kind of experiment and illustrates a potential conservative bias still present in *Cuffdiff2* version 2.2.1.

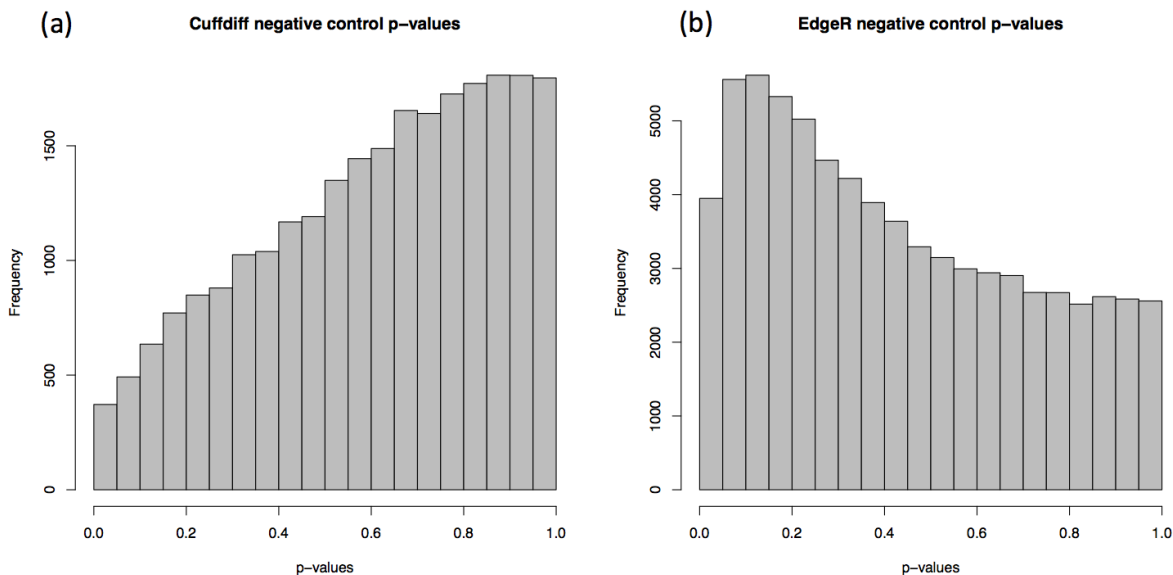

Figure 5: P-value histograms of results of differential expression analyses between two randomly selected groups. **a.** Transcript-level results from *Cuffdiff2* version 2.2.1, showing a conservative bias. **b.** Exon-level results from *EdgeR*, showing a liberal bias.

The positive control experiment in the main manuscript tested transcripts on the Y chromosome for differential expression between males and females in the FIN population

in the processed GEUVADIS dataset. Previous research [9] has shown earlier versions of *Cuffdiff2* performing poorly on this type of experiment, but version 2.2.1 discovers some statistically significant differences in expression on the Y chromosome between males and females. Most of the p-values from the 29 tested transcripts were low (Figure 6). However, 433 transcripts were assembled, so *Cuffdiff2* 2.2.1 seems to be a bit conservative in this regard about when it should perform a test.

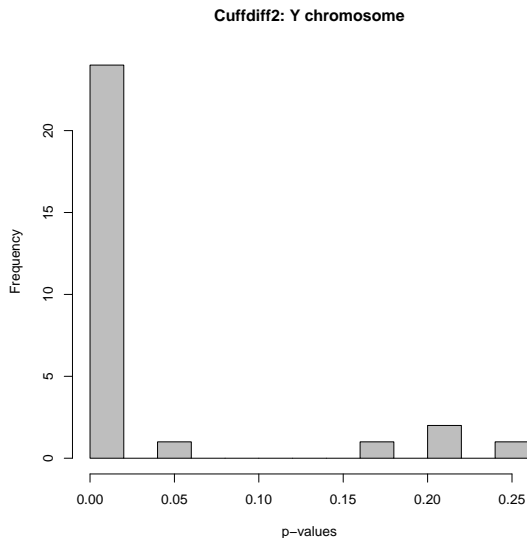

Figure 6: P-value distribution from *Cuffdiff2* 2.2.1, comparing expression of transcripts on the Y chromosome between males and females. 29 of 433 assembled transcripts were tested

## 5.2 Differential expression analyses for cancer and cell type datasets

Transcript-level differential expression analysis comparing lung adenocarcinoma ( $n = 12$ ) and normal cells ( $n = 12$ ), and comparing embryonic stem cells ( $n = 34$ ) to pre-implantation blastomeres ( $n = 78$ ), should show a strong differential expression signal, especially considering the sample sizes for these experiments. In the cancer vs. normal comparison, there were 19,748 transcripts with average FPKM greater than 1. *Cuffdiff2* (version 2.2.1) identified 4608 of these transcripts as differentially expressed ( $q < 0.05$ ). F-tests comparing nested linear models, as implemented in *Ballgown*, flagged 8875 of these highly-expressed transcripts as differentially expressed. Of 27,058 transcripts tested, EBSeq called 8736 differentially expressed (posterior probability of differential expression of at least 0.95). Similarly, in the cell type dataset, there were 16,430 transcripts with mean FPKM greater than 1. *Cuffdiff2* (2.2.1) calls 6816 of these differentially expressed ( $q < 0.05$ ) while *Ballgown* calls 9701 of them differentially expressed. And of 15,462 transcripts tested, EBSeq identifies 10,307 with posterior probabilities of differential expression of at least 0.95.

While both linear modeling and *Cuffdiff2* produced reasonable p-value distributions for these experiments (Supplementary Figure 7a,c), the relative numbers of differentially expressed transcripts discovered and the p-value distribution shapes show that *Cuffdiff2* is more conservative than the linear models. On its own, this result does not necessarily mean that *Cuffdiff2* (2.2.1) is too conservative, but *Cuffdiff2* also produced conservative p-value distributions in the negative and positive control experiments (main manuscript), we have prior knowledge that the differential expression signal should be quite strong in a tumor/normal or a cell type comparison, and the numbers of discoveries made by another published differential expression method (EBSeq) align more closely with the results from the linear model comparisons. Together these results indicate that conservative bias persists in *Cuffdiff2* (2.2.1). Past versions of *Cuffdiff2*, particularly 2.0.2, produced extremely conservative results on these datasets (Supplementary Figure 7b,d), calling 1 of 4454 highly-expressed transcripts in the tumor/normal dataset differentially expressed, while *Ballgown*'s linear models identified 774. Similarly, in the cell type dataset, *Cuffdiff2* 2.0.2 found 0 of 12,469 highly-expressed transcripts to be differentially expressed ( $q < 0.05$ ) between embryonic stem cells and preimplantation blastomeres, while the linear model tests in *Ballgown* found 6964.

These results in large-scale studies suggest that *Cuffdiff2*'s statistical significance estimates were strongly conservatively biased in version 2.0.2. While version 2.2.1 is better, *Cuffdiff2* is still not producing uniformly-distributed null p-values and is more conservative than other differential expression methods.

### 5.3 Simulation studies

The results for the first simulation, where the differential expression was set at the FPKM level, were that *Cuffdiff* (2.2.1) showed the same conservative bias we observed in the negative control experiment and possibly in the InSilico DB experiments. Using the  $q$ -value as a significance cutoff, *Cuffdiff2* called 1 transcript differentially expressed (controlling FDR at the 5% level), compared to 56 using *Ballgown*'s F-test (Supplementary Section 3). Accordingly, the p-value distributions showed similar patterns to those we observed in the adenocarcinoma and developmental cell datasets (Figure 8a). While the accuracy of the transcript rankings was comparable for both methods – for the linear models in *Ballgown*, 88 of the top 100 transcripts called differentially expressed were truly differentially expressed for *Ballgown* versus 85 for *Cuffdiff* 2.2.1 – an ROC curve based on  $q$ -value cutoff shows *Ballgown* outperforming *Cuffdiff2* in terms of sensitivity and specificity (Figure 8b).

We hypothesize that transcript length normalization may have something to do with the problems observed in *Cuffdiff2*'s statistical significance estimation, because in the second simulation scenario, where the number of reads sampled from each transcript was independent of its length, *Cuffdiff2* performed comparably to the linear model framework included in *Ballgown*, and both seemed to be performing accurately. The p-value histograms for both methods showed uniformly-distributed p-values at the high end and some signal at the low end, as expected (Figure 8c), and the ROC curves are approximately equivalent; both display high sensitivity and specificity (Figure 8d). In this scenario, of the top 100 transcripts



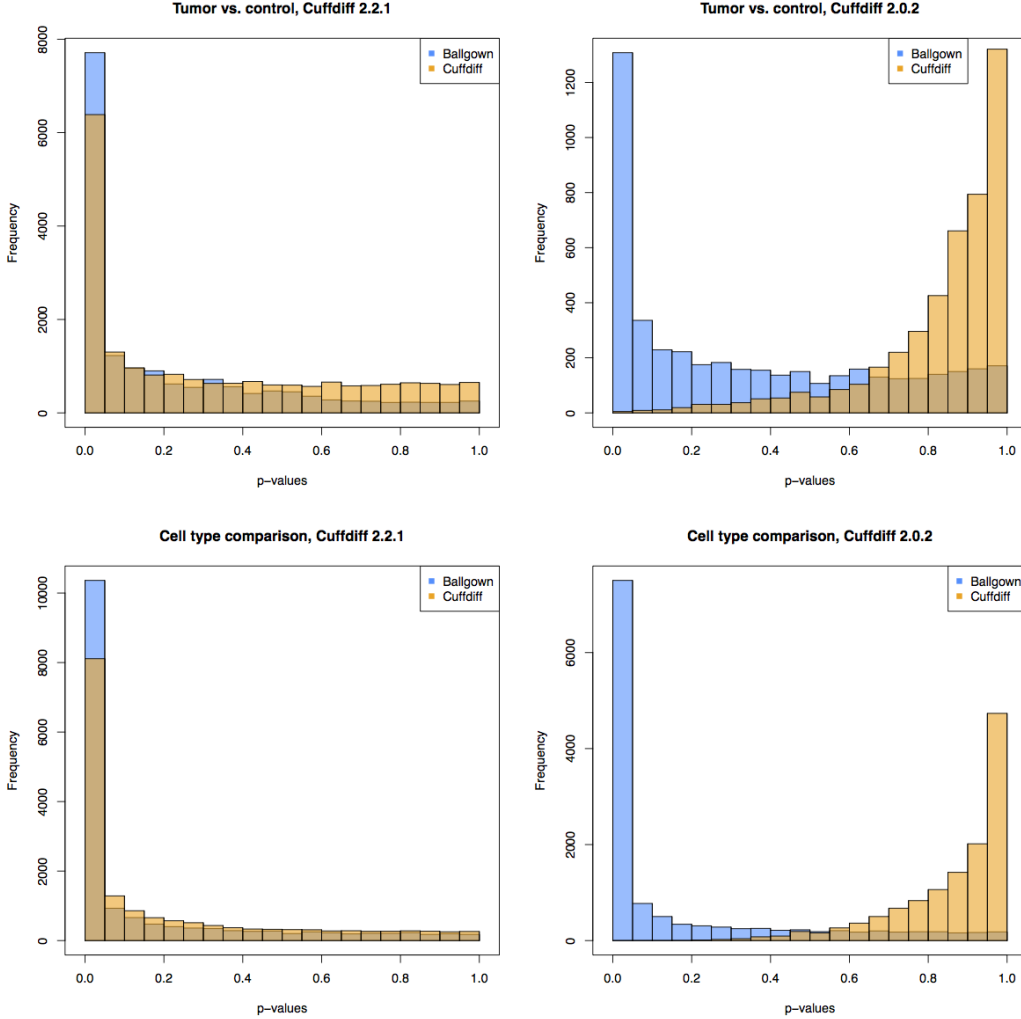

Figure 7: **Comparison of statistical significance estimates between *Cuffdiff2* and linear models in real datasets** **a.** Histograms of p-values from a comparison of 12 lung adenocarcinomas and 12 normal controls from female patients who never smoked. *Ballgown* in blue, *Cuffdiff2* (2.2.1) in orange. **b.** Same comparison as in panel (a), but using the *Cuffdiff2* version 2.0.2 results available from InSilico DB. *Cuffdiff2* version 2.0.2 had a strong conservative bias. Linear model results from *Ballgown* differ from panel (a) because the FPKM estimates used were from an older version of *Cufflinks*, though the linear model results do not demonstrate conservative bias. **c.** Histograms of p-values from the comparison of 78 pre-implantation blastomere samples and 34 embryonic stem cell samples (*Ballgown* in blue, *Cuffdiff2* (2.2.1) in orange). **d.** Same comparison as in panel (c), but using the *Cuffdiff2* version 2.0.2 results available from InSilico DB. As in panel (b), *Cuffdiff2* 2.0.2 showed a strong conservative bias.

ranked by each method, 96 are truly differentially expressed for *Cuffdiff2* and 90 are for the linear models implemented in *Ballgown*. This shows that the models implemented in *Cuffdiff2* are accurate under some conditions – e.g., when the number of sequencing reads from a transcript is unrelated to its length – that may be somewhat unrealistic.

## 6 Comparison of average coverage and FPKM as expression measurements in differential expression studies

We compared the previous differential expression results, which were based on measuring transcript abundance using FPKM, with analyses using average per-base read coverage as the transcript expression measurement instead. Doing this comparison was straightforward, since *Tablemaker* outputs FPKM estimates from *Cufflinks* along with a variety of other expression measurements for the features of a transcriptome. We first did a comparison between FPKM and average coverage using First, we used our simulated dataset to investigate the impact of using average coverage as the transcript expression measurement, compared to using FPKM, as was done in our previous analyses. To do this comparison, we re-analyzed the data we simulated in the scenario where differential expression occurred at the FPKM level (Supplementary Section 4, "Simulation studies", first simulation; Supplementary Figure 8a-b) but used average coverage as the transcript-level expression measurement. The differential expression rankings measuring transcript expression with FPKM and with average coverage were highly correlated (Figure 9a), with a correlation coefficient of 0.66. The p-value distribution using average coverage (Figure 9b) was similar to the p-value distribution using FPKM (Figure 8a), though only 25 transcripts were found to be differentially expressed ( $q < 0.05$ ), compared to 56 using FPKM. We also observed correlated ranks ( $r = 0.57$ ) between the differential expression results testing whether RIN value affected expression in the GEUVADIS dataset (Figure 9c). These results confirm that in differential expression analyses, count-based and FPKM-based (length-normalized) expression measurements perform similarly. *Ballgown* allows users to perform analyses with whatever expression measurements are available for their transcriptome, so for example, RSEM [19] users can use such as transcripts per million (TPM) [28] as an expression measurement. The framework also facilitates easy exploration of the different measurement options.

## 7 Computational efficiency and timing results

Next we investigated the computational efficiency of our approach compared to the standard *Cufflinks* pipeline. *Tophat* and *Cufflinks* can be run on each sample separately, but *Cuffdiff2* must be run on all samples simultaneously. While *Cuffdiff2* can make use of many cores on a single computer, is not parallelizable across computers. It has been noted that *Cuffdiff2* can take weeks or longer to run on experiments with a few hundred samples. This issue

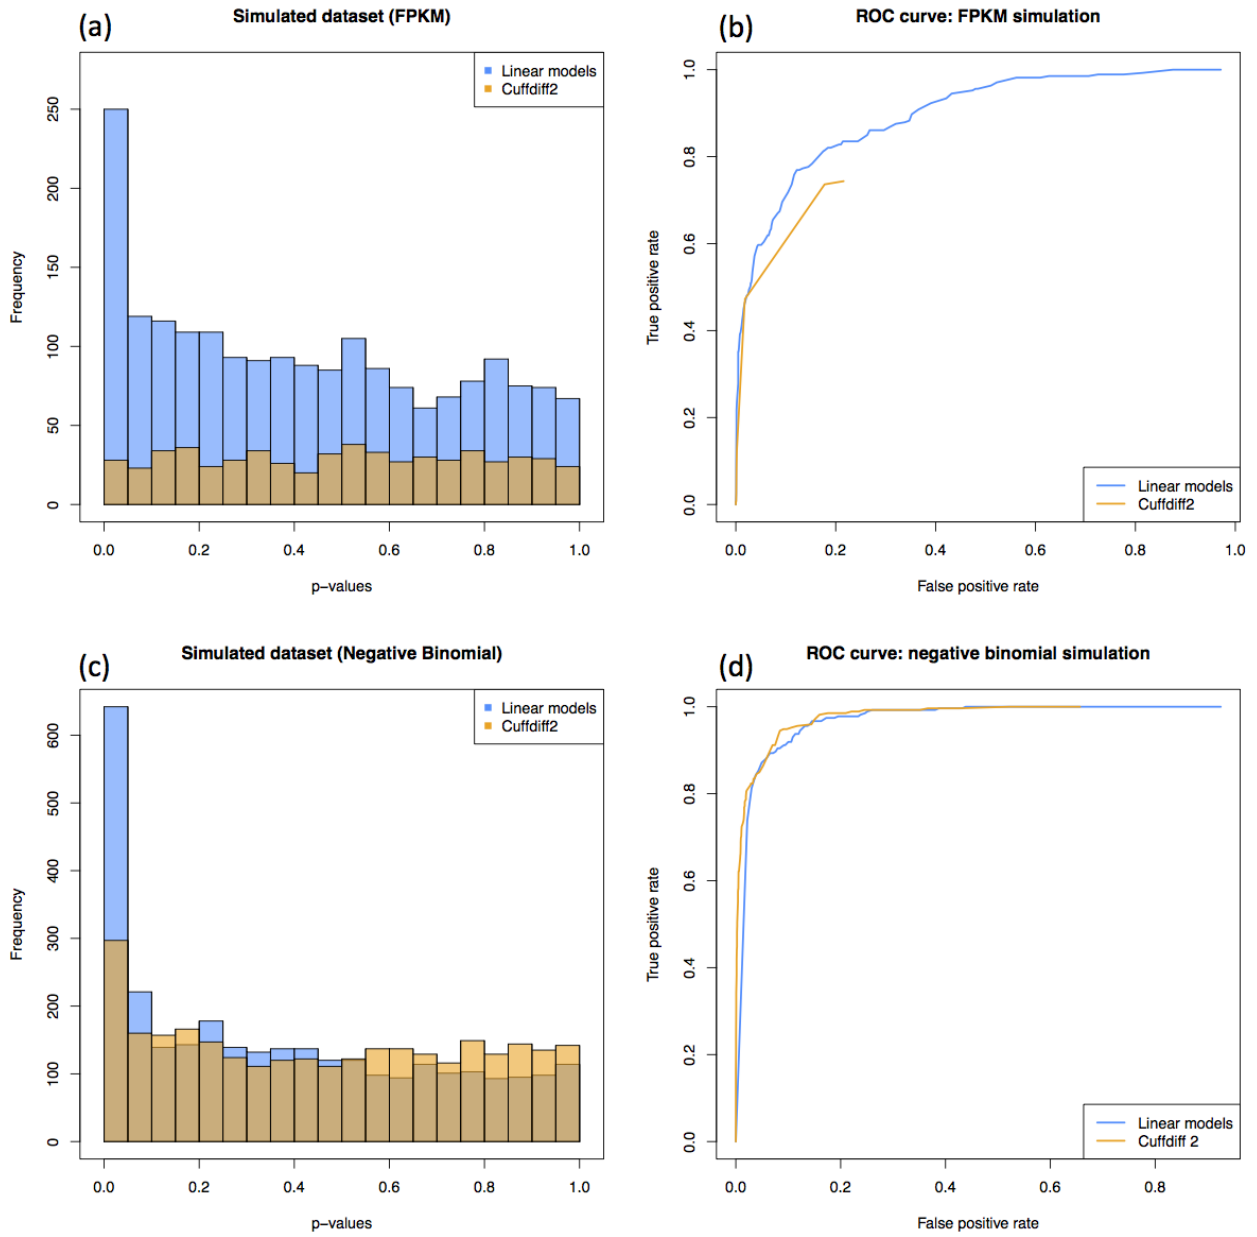

Figure 8: **Comparison of statistical significance between *Cuffdiff2* and linear models in *Ballgown* in simulated datasets** **a.** Histograms of p-values from a simulated data set of 2,745 transcripts where differential expression was induced between 10 cases and 10 controls in 10% of transcripts at the FPKM level (*Ballgown* in blue, *Cuffdiff2* in orange). **b.** ROC curve comparing the abilities of *Cuffdiff2* and linear modeling to identify differentially expressed transcripts in the FPKM simulation based on q-value. **c.** Histograms of p-values from a simulated data set of 2,745 transcripts in 10 cases and 10 controls, where 10% of transcripts were simulated to be differentially expressed, but the number of reads generated from each transcript was independent of transcript length. **d.** ROC curve comparing the abilities of *Cuffdiff2* and linear modeling to identify differentially expressed transcripts in the transcript-length-independent simulation study.

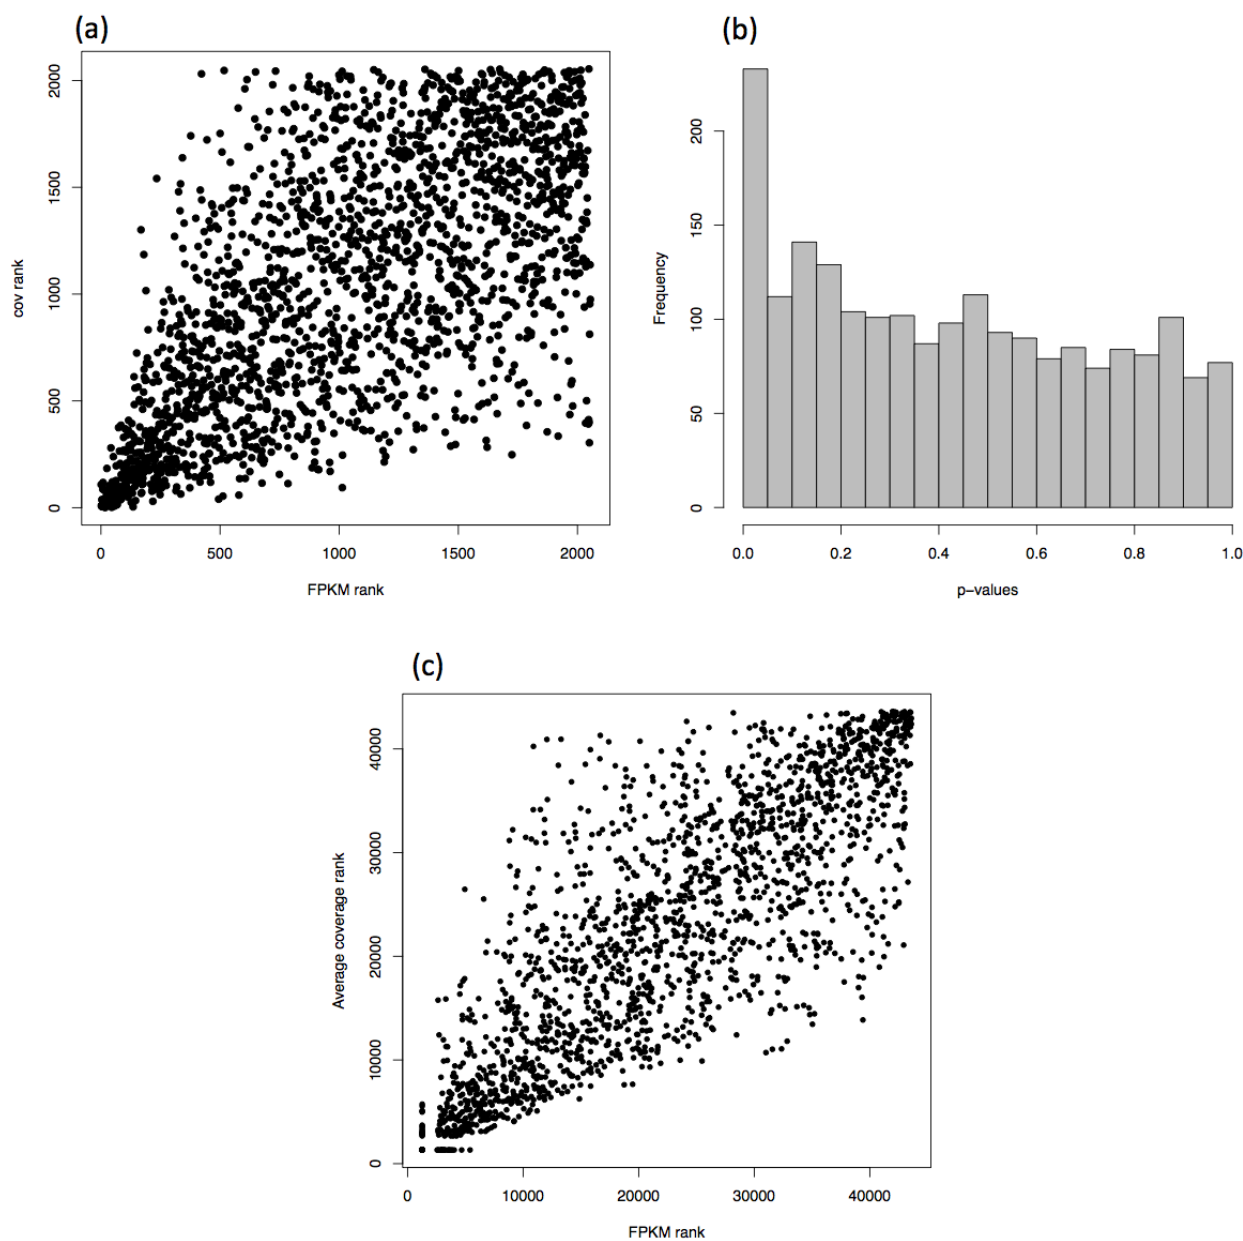

Figure 9: **Using average per-base coverage as transcript expression measurement instead of FPKM.** **a.** Differential expression ranks for transcripts in a case/control simulation ( $n = 10$  per group), using FPKM as the expression measurement (x-axis) vs. using average coverage (y-axis). **b.** Distribution of p-values from differential expression tests between the 10 cases and 10 controls, using average coverage as the expression measurement. This distribution is very similar to the distribution observed when using FPKM as the expression measurement (Figure 8a). **c.** Rankings of the effect of RIN on transcript expression in the GEUVADIS dataset, using FPKM as the transcript expression measurement (x-axis) vs. using average coverage (y-axis). For visibility, 2000 transcripts were randomly sampled from the dataset for the plot.

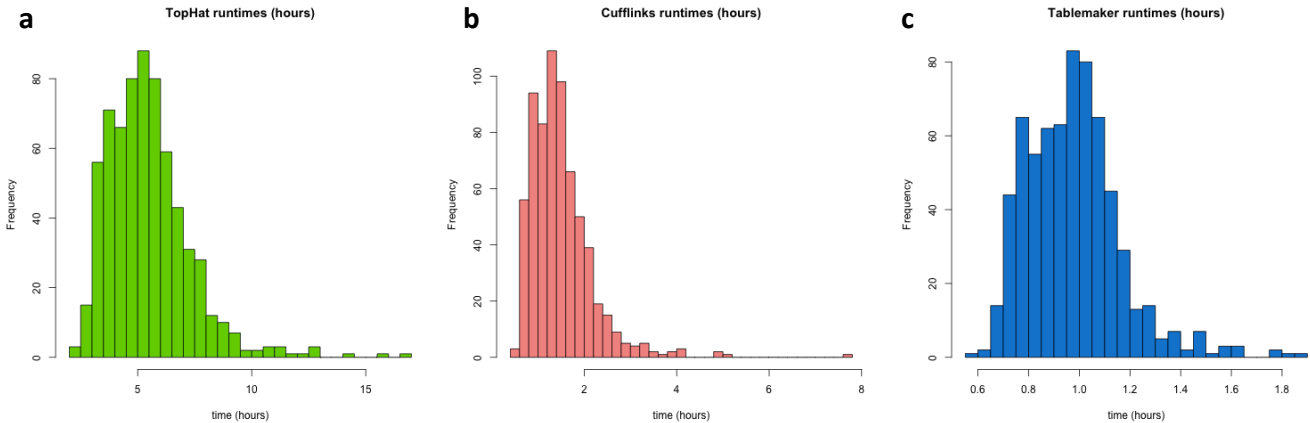

Figure 10: **Timing results for the 667 GEUVADIS samples at each stage of the pipeline.** **a.** Timing (in hours) for each sample to run through *TopHat2*. **b.** Timing (in hours) for each sample to run through *Cufflinks*. **c.** Timing (in hours) for each sample to run through *Tablemaker*.

has led consortia and other groups to rely on unpublished software for transcript abundance estimation[1, 6].

We compared each component of the pipeline in terms of computational time on one of our simulated dataset (the second, simpler scenario) with 20 samples and 2,745 transcripts. The *Tophat2* - *Cufflinks* - *Tablemaker* - *Ballgown* pipeline was fastest, taking about 5.4 minutes per sample for *Tablemaker*, 2.3 seconds to load transcript data into R and less than 0.1 seconds for differential expression analysis. This is faster than the recently published *Tophat2* - *Cufflinks* - *Cuffquant* - *Cuffdiff2* pipeline [25], which required about 3 minutes per sample for *Cuffquant* and 19 minutes for differential expression analysis with *Cuffdiff2*. The *Ballgown* - *Tablemaker* pipeline was also substantially faster than directly running *Cufflinks* - *Cuffdiff2*, where the *Cuffdiff2* step took about 68 minutes. For all these pipelines, *Tophat2* took about 1 hour per sample and *Cufflinks* about 2 minutes per sample. All possible multicore processes (*TopHat*, *Cufflinks*, *Cuffdiff2*, *Cuffquant*, *Tablemaker*) were run on 4 cores.

We also calculated the per-sample distribution of processing times for each step in the *Tophat2* - *Cufflinks* - *Tablemaker* pipeline for all 667 samples in the GEUVADIS study [14] (Figure 10). *Tablemaker* took a median of 0.97 hours per sample (IQR 0.24 hours) on a standard 4 core computer; this calculation can be parallelized across samples. By contrast, *Cuffdiff2* would take months to perform this analysis on a standard 4 core computer. *Ballgown* multiclass differential expression analysis between the CEU ( $n = 162$ ), YRI ( $n = 163$ ), FIN ( $n = 114$ ), GBR ( $n = 115$ ) and TSI ( $n = 93$ ) samples for 334,206 transcripts took 42 minutes on a single core Desktop computer.

## 8 Software

1. *Ballgown* - Available from Bioconductor [10] <http://www.bioconductor.org/packages/devel/bioc/html/ballgown.html> Installation instructions and tutorial for use are available in the package vignette, and at <https://github.com/alyssafrazee/ballgown>
2. *Tablemaker* - Linux binary: [http://figshare.com/articles/Tablemaker\\_Linux\\_Binary/1053137](http://figshare.com/articles/Tablemaker_Linux_Binary/1053137); Mac OS X binary: [http://figshare.com/articles/Tablemaker\\_OS\\_X\\_Binary/1053136](http://figshare.com/articles/Tablemaker_OS_X_Binary/1053136); source code/installation instructions: <https://github.com/alyssafrazee/tablemaker>
3. *polyester* - <https://github.com/alyssafrazee/ballgown/tree/master/polyester>

## 9 Scripts and Data

Scripts and links to all data are available at: [https://github.com/alyssafrazee/ballgown\\_code/](https://github.com/alyssafrazee/ballgown_code/)

## References

- [1] Peter AC't Hoen, Marc R Friedländer, Jonas Almlöf, Michael Sammeth, Irina Pulyakhina, Seyed Yahya Anvar, Jeroen FJ Laros, Henk PJ Buermans, Olof Karlberg, Mathias Brännvall, et al. Reproducibility of high-throughput mrna and small rna sequencing across laboratories. *Nature biotechnology*, 2013.
- [2] Simon Anders and Wolfgang Huber. Differential expression analysis for sequence count data. *Genome biol*, 11(10):R106, 2010.
- [3] George EP Box and David R Cox. An analysis of transformations. *Journal of the Royal Statistical Society. Series B (Methodological)*, pages 211–252, 1964.
- [4] Alain Coletta, Colin Molter, Robin Duqué, David Steenhoff, Jonatan Taminau, Virginie De Schaetzen, Stijn Meganck, Cosmin Lazar, David Venet, Vincent Detours, et al. Insilico db genomic datasets hub: an efficient starting point for analyzing genome-wide studies in genepattern, integrative genomics viewer, and r/bioconductor. 2012.
- [5] 1000 Genomes Project Consortium et al. An integrated map of genetic variation from 1,092 human genomes. *Nature*, 491(7422):56–65, 2012.
- [6] Manolis Dermitzakis, Gad Getz, Kristin Ardlé, Roderic Guigo, and for the GTEx consortium. Response to: “gtex is throwing away 90% of their data”. <http://liorpachter.wordpress.com/2013/10/31/response-to-gtex-is-throwing-away-90-of-their-data/>, 2013.

- [7] B Devlin and Kathryn Roeder. Genomic control for association studies. *Biometrics*, 55(4):997–1004, 1999.
- [8] Paul Flicek, M Ridwan Amode, Daniel Barrell, Kathryn Beal, Konstantinos Billis, Simon Brent, Denise Carvalho-Silva, Peter Clapham, Guy Coates, Stephen Fitzgerald, et al. Ensembl 2014. *Nucleic acids research*, 42(D1):D749–D755, 2014.
- [9] Alyssa C Frazee, Sarven Sabuncuyan, Kasper D Hansen, Rafael A Irizarry, and Jeffrey T Leek. Differential expression analysis of rna-seq data at single-base resolution. *Biostatistics*, page kxt053, 2014.
- [10] Robert C Gentleman, Vincent J. Carey, Douglas M. Bates, and others. Bioconductor: Open software development for computational biology and bioinformatics. *Genome Biology*, 5:R80, 2004.
- [11] Trevor Hastie and Robert Tibshirani. Generalized additive models. *Statistical science*, pages 297–310, 1986.
- [12] Sang Cheol Kim, Yeonjoo Jung, Jinah Park, Sooyoung Cho, Chaehwa Seo, Jaesang Kim, Pora Kim, Jehwan Park, Jihae Seo, Jiwoong Kim, et al. A high-dimensional, deep-sequencing study of lung adenocarcinoma in female never-smokers. *PloS one*, 8(2):e55596, 2013.
- [13] Ben Langmead, Kasper D Hansen, Jeffrey T Leek, et al. Cloud-scale rna-sequencing differential expression analysis with myrna. *Genome Biol*, 11(8):R83, 2010.
- [14] Tuuli Lappalainen, Michael Sammeth, Marc R Friedländer, Peter AC’t Hoen, Jean Monlong, Manuel A Rivas, Mar González-Porta, Natalja Kurbatova, Thasso Griebel, Pedro G Ferreira, et al. Transcriptome and genome sequencing uncovers functional variation in humans. *Nature*, 2013.
- [15] Michael Lawrence, Wolfgang Huber, Hervé Pagès, Patrick Aboyoun, Marc Carlson, Robert Gentleman, Martin T Morgan, and Vincent J Carey. Software for computing and annotating genomic ranges. *PLoS computational biology*, 9(8):e1003118, 2013.
- [16] Jeffrey T Leek and John D Storey. Capturing heterogeneity in gene expression studies by surrogate variable analysis. *PLoS Genetics*, 3(9):e161, 2007.
- [17] Rasko Leinonen, Hideaki Sugawara, and Martin Shumway. The sequence read archive. *Nucleic acids research*, page gkq1019, 2010.
- [18] Ning Leng, John A Dawson, James A Thomson, Victor Ruotti, Anna I Rissman, Bart MG Smits, Jill D Haag, Michael N Gould, Ron M Stewart, and Christina Kendzierski. Ebseq: an empirical Bayes hierarchical model for inference in RNA-seq experiments. *Bioinformatics*, 29(8):1035–1043, 2013.

- [19] Bo Li and Colin Dewey. Rsem: accurate transcript quantification from rna-seq data with or without a reference genome. *BMC bioinformatics*, 12(1):323, 2011.
- [20] Joseph N Paulson, O Colin Stine, Héctor Corrada Bravo, and Mihai Pop. Differential abundance analysis for microbial marker-gene surveys. *Nature methods*, 2013.
- [21] Shaun Purcell, Benjamin Neale, Kathe Todd-Brown, Lori Thomas, Manuel AR Ferreira, David Bender, Julian Maller, Pamela Sklar, Paul IW De Bakker, Mark J Daly, et al. Plink: a tool set for whole-genome association and population-based linkage analyses. *The American Journal of Human Genetics*, 81(3):559–575, 2007.
- [22] Andrey A Shabalín. Matrix eqtl: ultra fast eqtl analysis via large matrix operations. *Bioinformatics*, 28(10):1353–1358, 2012.
- [23] Gordon K Smyth et al. Linear models and empirical bayes methods for assessing differential expression in microarray experiments. *Stat Appl Genet Mol Biol*, 3(1):3, 2004.
- [24] John D Storey and Robert Tibshirani. Statistical significance for genomewide studies. *Proceedings of the National Academy of Sciences*, 100(16):9440–9445, 2003.
- [25] C. Trapnell, D. Cacchiarelli, J. Grimsby, P. Pokharel, S. Li, M. Morse, N. J. Lennon, K. J. Livak, T. S. Mikkelsen, and J. L. Rinn. The dynamics and regulators of cell fate decisions are revealed by pseudotemporal ordering of single cells. *Nat. Biotechnol.*, Mar 2014.
- [26] Cole Trapnell, David G Hendrickson, Martin Sauvageau, Loyal Goff, John L Rinn, and Lior Pachter. Differential analysis of gene regulation at transcript resolution with rna-seq. *Nature biotechnology*, 31(1):46–53, 2012.
- [27] Cole Trapnell, Brian A Williams, Geo Pertea, Ali Mortazavi, Gordon Kwan, Marijke J van Baren, Steven L Salzberg, Barbara J Wold, and Lior Pachter. Transcript assembly and quantification by rna-seq reveals unannotated transcripts and isoform switching during cell differentiation. *Nature biotechnology*, 28(5):511–515, 2010.
- [28] Günter P Wagner, Koryu Kin, and Vincent J Lynch. Measurement of mRNA abundance using RNA-seq data: RPKM measure is inconsistent among samples. *Theory in Biosciences*, 131(4):281–285, 2012.
- [29] Liying Yan, Mingyu Yang, Hongshan Guo, Lu Yang, Jun Wu, Rong Li, Ping Liu, Ying Lian, Xiaoying Zheng, Jie Yan, et al. Single-cell rna-seq profiling of human preimplantation embryos and embryonic stem cells. *Nature structural & molecular biology*, 2013.
